# Supplementary material
Source: MDPI journal article supplement (https://www.mdpi.com/2073-4395/12/7/1524)
Supplement: s1 [file s1]

# Comparative Analysis of Plant Growth-Promoting Rhizobacteria (PGPR) and Chemical Fertilizers on Quantitative and Qualitative Characteristics of Rainfed Wheat

## Supplementary Materials

**Table S1.** Combined analysis of variance of the effects applied plant growth-promoting rhizobacteria and their combinations with need-based chemical fertilizers on yield components of Azar-2 rainfed wheat cultivar in open field experiments during three cropping seasons.

| Source of Variation | Df <sup>a</sup> | Biological Yield | Grain Yield | Straw Yield | Harvest Index | 1000-Seed Weight |
|---------------------|-----------------|------------------|-------------|-------------|---------------|------------------|
| Mean Squares        |                 |                  |             |             |               |                  |
| Year                | 2               | 66700000 **      | 16272165**  | 15400000**  | 0.159**       | 13.81**          |
| Replication         | 9               | 5144379**        | 660328**    | 2402988ns   | 0.003ns       | 15.34**          |
| Treatment           | 14              | 149300000**      | 2312531**   | 1874841**   | 0.002ns       | 24.03**          |
| Year × Treatment    | 28              | 1613781ns        | 207086ns    | 2723626**   | 0.003ns       | 7.36**           |
| Error               | 126             | 1235426          | 156146      | 626301      | 0.01          | 2.83             |
| Total               | 176             |                  |             |             |               |                  |
| CV (%)              |                 | 18.26            | 17.11       | 20.95       | 10.18         | 4.15             |

<sup>a</sup> degree of freedom; ns – not significant; \* and \*\* – significant at 1% and 5% probability level, respectively.

**Table S2.** Means comparison analysis of yield components of Azar-2 rainfed wheat cultivar under the effects of PGPR and PGPR + chemical fertilizers during 2016-2017, 2017-2018, and 2018-2019 growing seasons.

| Year      | Biological<br>Yield (kg/ha) | Grain Yield<br>(kg/ha) | Straw Yield<br>(kg/ha) | Harvest<br>Index | 1000-Seed<br>Weight (g) |
|-----------|-----------------------------|------------------------|------------------------|------------------|-------------------------|
| 2016-2017 | 5932 b                      | 2395 b                 | 3537 b                 | 0.41 b           | 40.89 a                 |
| 2017-2018 | 4060 c                      | 1751 c                 | 2310 c                 | 0.44 a           | 40.70 a                 |
| 2018-2019 | 8269 a                      | 2781 a                 | 5488 a                 | 0.34 c           | 39.98 b                 |
| LSD 5%    | 401.59                      | 142.77                 | 377.9                  | 0.019            | 0.608                   |

Means followed by the same letters within columns are not significantly different at the 5% level.

**Table S3.** Combined analysis of variance of the effects applied plant growth-promoting rhizobacteria and their combinations with soil test need-based chemical fertilizers on qualitative characteristics of Azar-2 rainfed wheat cultivar in open field experiments during three cropping seasons.

| Source of Variation | Df <sup>a</sup> | Concentration in grain (%) |              |              | Concentration in flag leaves (%) |              |              | Grain protein (%) |
|---------------------|-----------------|----------------------------|--------------|--------------|----------------------------------|--------------|--------------|-------------------|
|                     |                 | N                          | P            | K            | N                                | P            | K            |                   |
|                     |                 | Mean Squares               |              |              |                                  |              |              |                   |
| Year                | 2               | 0.008<br>n.s               | 0.153 **     | 0.862 **     | 0.633<br>n.s                     | 0.118 **     | 38.239<br>** | 0.25 n.s          |
| Replication         | 9               | 0.078<br>n.s               | 0.002<br>n.s | 0.004<br>n.s | 0.373<br>n.s                     | 0.006<br>n.s | 0.203 **     | 2.655 n.s         |
| Treatment           | 14              | 0.043<br>n.s               | 0.005<br>n.s | 0.002<br>n.s | 0.541<br>n.s                     | 0.008 *      | 0.056 *      | 1.453 n.s         |
| Year ×Treatment     | 28              | 0.062<br>n.s               | 0.003 *      | 0.004<br>n.s | 0.876<br>n.s                     | 0.007<br>n.s | 0.513<br>n.s | 2.079 n.s         |
| Error               | 126             | 0.094                      | 0.002        | 0.002        | 0.515                            | 0.004        | 0.031        | 3.166             |
| Total               | 176             |                            |              |              |                                  |              |              |                   |
| CV (%)              |                 | 16.323                     | 18.39        | 13.02        | 21.60                            | 22.74        | 9.75         | 16.25             |

<sup>a</sup> degree of freedom; n.s – not significant; \* and \*\* – significant at 1% and 5% probability level, respectively.
